# Supplementary material
Source: ML conference proceedings conference paper supplement (https://aclanthology.org/2026.semeval-1.140)

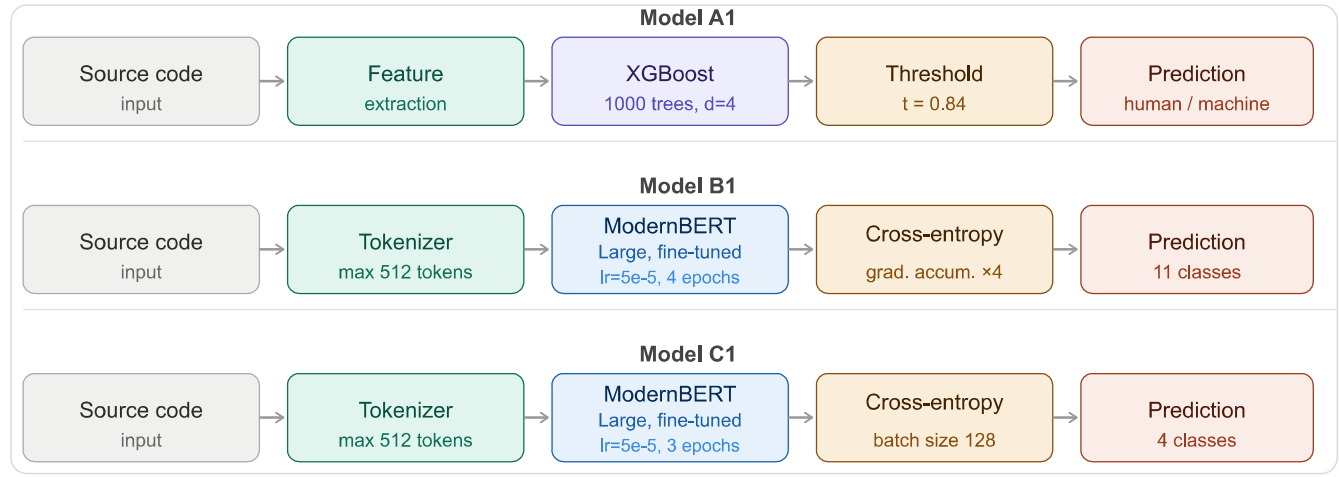

Supplement: SupplementaryMaterial [file pipelines_a1_b1_c1.pdf › figures/pipelines_a1_b1_c1.pdf]
